# Supplementary material for: A biocompatible nano-barium sulfonate system for quad-modal imaging-guided photothermal radiotherapy of tumors
Source: Royal Society of Chemistry journal article supplement (doi:10.1039/d3bm00325f), 2023-01-01
Supplement: d3bm00325f1.pdf [file d3bm00325f1.pdf]

## Supporting Information

### A Biocompatible Nano-Barium Sulfonate System for Quad-modal, Imaging-guided Photothermal Radiotherapy of Tumors

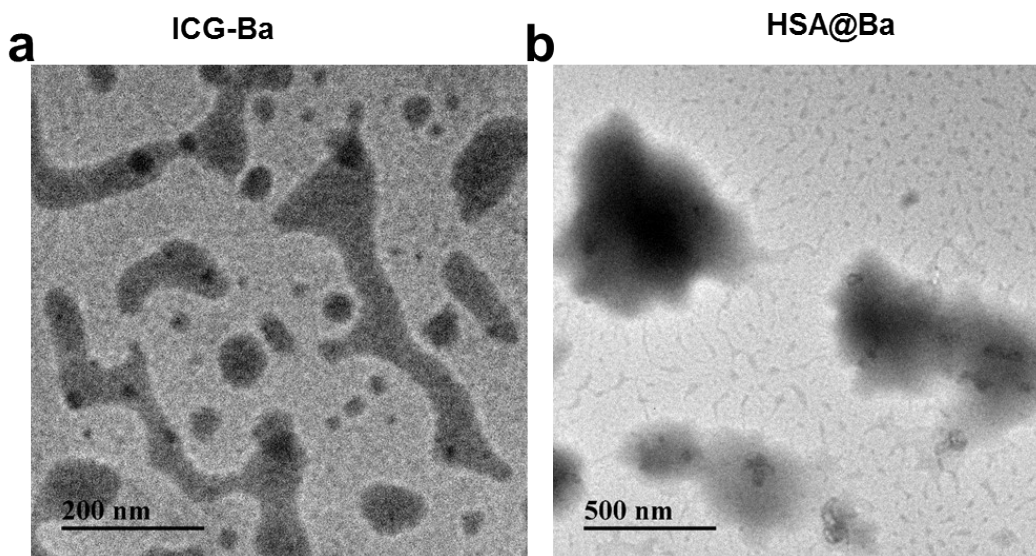

Figure S1 TEM images of (a) ICG-Ba and (b) HSA@Ba.

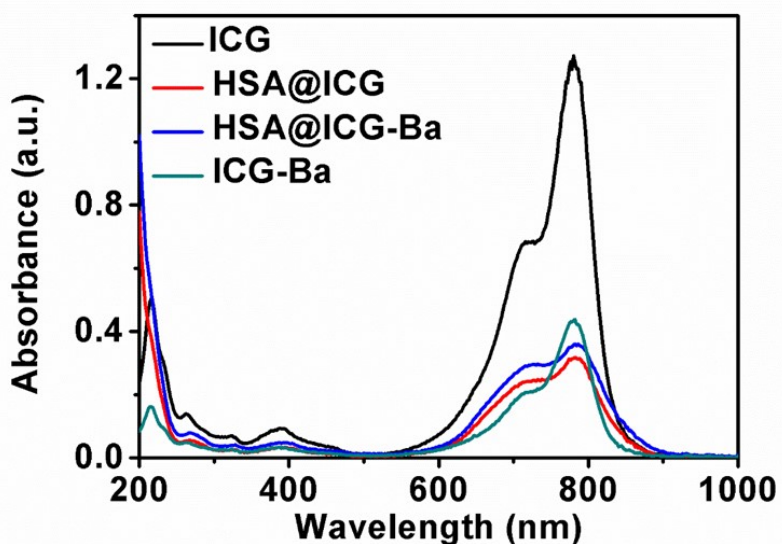

Figure S2 UV-vis-NIR spectra of free ICG, HSA@ICG and HSA@ICG-Ba nanoparticles and ICG-Ba.

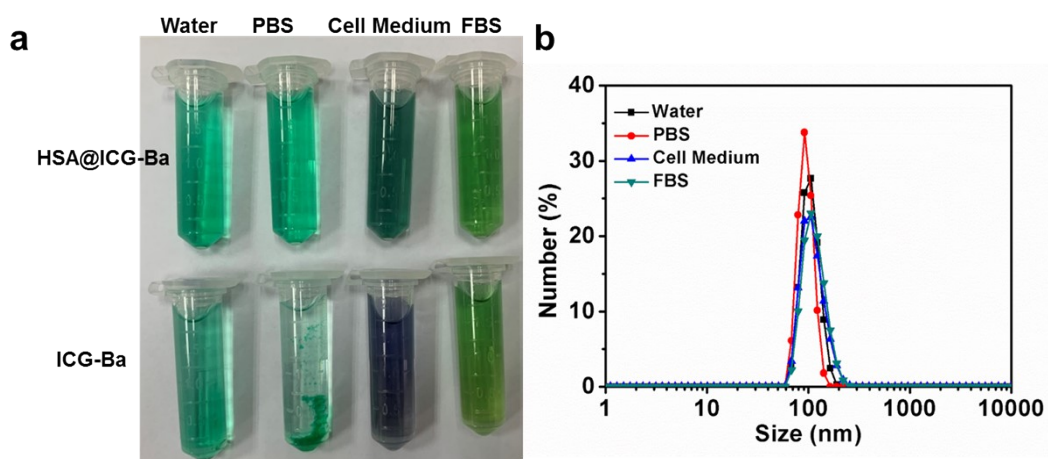

**Figure S3** (a) A photo of HSA@ICG-Ba and ICG-Ba in different solutions including water, PBS, cell culture medium and FBS. (b) Hydrodynamic diameters of HSA@ICG-Ba in PBS, cell culture medium and FBS solution.

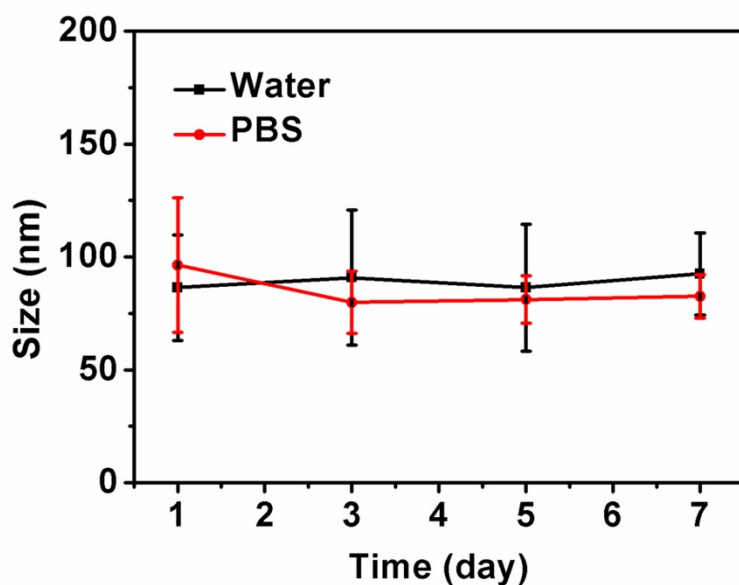

**Figure S4** The averaged hydrodynamic diameters of HSA@ICG-Ba in water or PBS in one week.

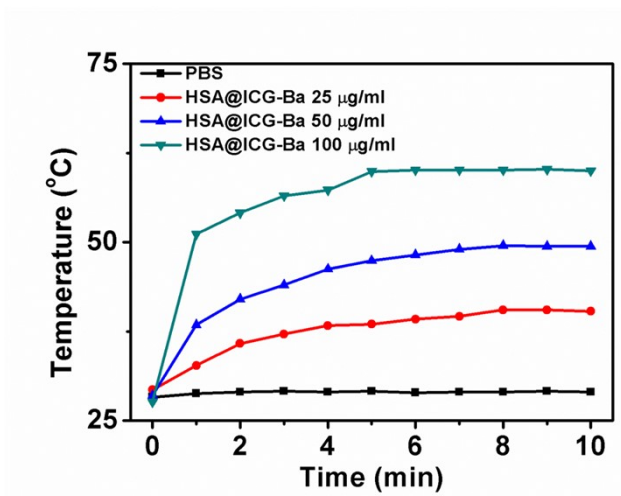

**Figure S5** The temperature change of the different concentrations of HSA@ICG-Ba under 808 nm laser irradiation at the power density of 0.5 W/cm<sup>2</sup>.

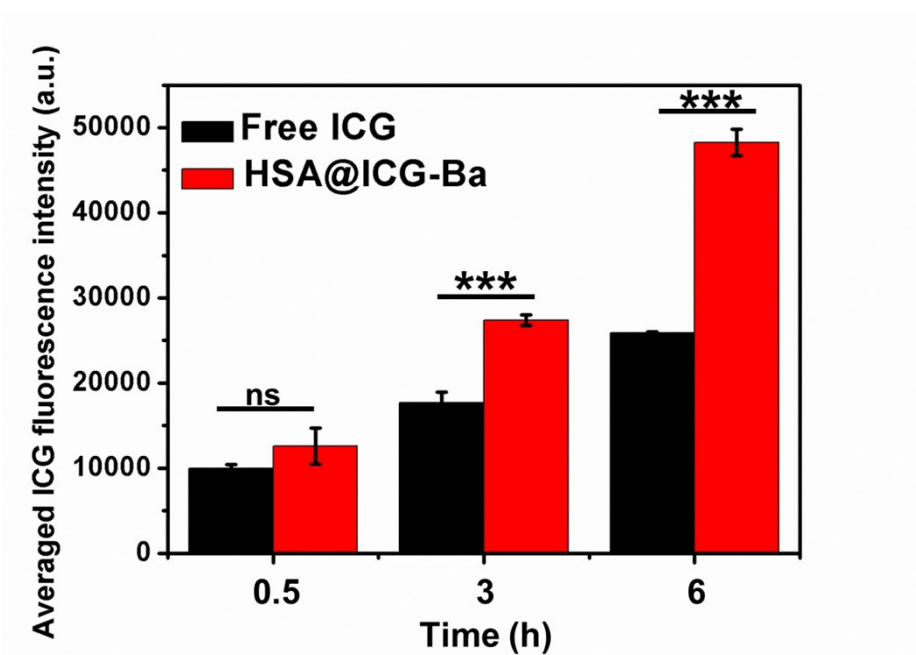

**Figure S6** The cellular uptake of ICG in the cells incubated with free ICG or HSA@ICG-Ba for different times. Data are presented as the mean  $\pm$  SD from representative experiments. \*P < 0.05, \*\*P < 0.01, \*\*\*P < 0.001 analysed by Student's t-test.

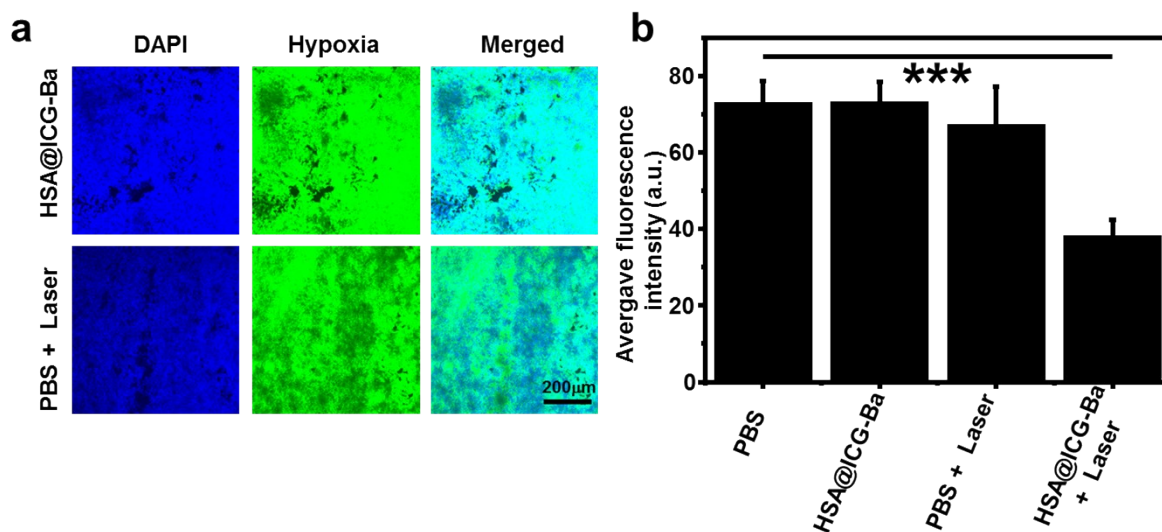

**Figure S7** (a) Hypoxyprobe (pimonidazole) immunofluorescent staining assay of tumor slices from mice subjected to HSA@ICG-Ba injection or 808-nm laser irradiation. (b) Quantitative analysis of the hypoxic immunofluorescence imaging intensity in the tumor slices.

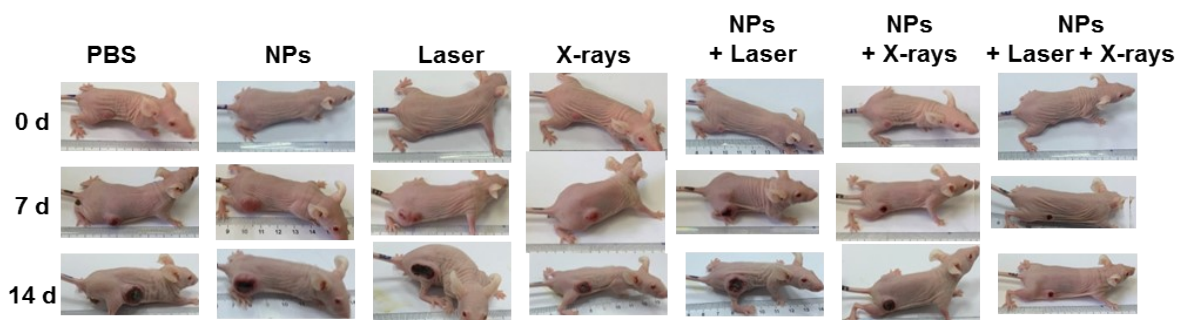

**Figure S8** Representative digital photos of 4T1 solid tumor-bearing mice after different treatments at designated days (0 d, 7 d, 14 d) using the different treatments indicated.
